# Supplementary material for: Neighborhood Violent Crime and Perceived Stress in Pregnancy
Source: MDPI journal article supplement (doi:10.3390/ijerph17155585), 2020-08-03
Supplement: s1 [file s1]

**Supplemental Table S1.** Demographic characteristics of included and non-included participants from *Motherhood and Microbiome* cohort (n= 1, 943).

| <b>Characteristic</b> | <b>Not included<br/>(n = 593)</b> | <b>Included<br/>(n = 1309)</b> | <b>P</b> |
|-----------------------|-----------------------------------|--------------------------------|----------|
| Age, mean (SD)        | 30.1 (5.7)                        | 27.8 (5.9)                     | <0.0001  |
|                       | <u>n (col %)</u>                  | <u>n (col %)</u>               |          |
| Nulliparous           | 249 (42.0)                        | 580 (44.3)                     | 0.34     |
| Black                 | 278 (46.9)                        | 950 (72.6)                     | <0.0001  |
| Married               | 302 (50.9)                        | 963 (73.6)                     | <0.0001  |
| Medicaid              | 215 (36.3)                        | 792 (60.5)                     | <0.0001  |
| PSS $\geq$ 30         | 63 (13.5)                         | 281 (21.5)                     | 0.0002   |
